# Supplementary material
Source: publisher site journal article supplement (https://www.dovepress.com/article/250334)
Supplement: Supplementary file 1 [file get_supplementary_file.php]

# Appendix

## Data Description

### Continuous variables

| Variables               | N    | Minimum | Maximum | Mean     | Std. Deviation |
|-------------------------|------|---------|---------|----------|----------------|
| Age                     | 1118 | 20      | 83      | 56.84    | 9.571          |
| BMI                     | 683  | 17.63   | 70.17   | 29.1844  | 5.61010        |
| Height                  | 1089 | 102.00  | 189.00  | 165.3168 | 8.35251        |
| PA systolic             | 1119 | 5.00    | 80.00   | 28.2413  | 7.51795        |
| EuroScore II            | 685  | .69     | 56.98   | 4.5962   | 5.90280        |
| DAO*                    | 1119 | 0       | 42      | 3.78     | 4.426          |
| Blood loss at 24 hours  | 589  | 55      | 2500    | 687.41   | 350.719        |
| Hospital stay (in days) | 1117 | 1       | 378     | 12.64    | 14.548         |
| PLoS (in days)          | 1119 | 1       | 378     | 8.87     | 13.786         |
| Valid N (listwise)      | 585  |         |         |          |                |

\*Duration from admission till operation

## Comorbidities

|                         |                                                                   | Count      | Column N %   |
|-------------------------|-------------------------------------------------------------------|------------|--------------|
| Hypertension            | No hypertension                                                   | 207        | 18.8%        |
|                         | Hypertension                                                      | 896        | 81.2%        |
| Hypercholesterolaemia   | No                                                                | 251        | 22.7%        |
|                         | Yes                                                               | 856        | 77.3%        |
| Renal disease           | Creatinine >200 µmol/L                                            | 31         | 2.8%         |
|                         | Creatinine >200 µmol/L,4<br>- Dialysis - chronic renal<br>failure | 8          | .7%          |
|                         | Dialysis - acute renal<br>failure                                 | 8          | .7%          |
|                         | Dialysis - chronic renal<br>failure                               | 26         | 2.3%         |
|                         | None                                                              | 1046       | 93.5%        |
|                         | Renal failure                                                     | No         | 1066         |
|                         | Yes                                                               | 31         | 2.8%         |
| <b>Diabetic</b>         | <b>No</b>                                                         | <b>341</b> | <b>30.6%</b> |
|                         | <b>Yes</b>                                                        | <b>775</b> | <b>69.4%</b> |
| Diabetes treatment      | Diet                                                              | 26         | 2.3%         |
|                         | Oral alone                                                        | 306        | 27.4%        |
|                         | Insulin (with or without<br>oral)                                 | 443        | 39.7%        |
|                         | None                                                              | 341        | 30.6%        |
| Cerebrovascular disease | CVA over 2 weeks                                                  | 17         | 1.6%         |
|                         | Previous carotid surgery                                          | 2          | .2%          |
|                         | TIA                                                               | 5          | .5%          |
|                         | None                                                              | 1049       | 97.8%        |
| Chronic lung disease    | Asthma                                                            | 23         | 2.1%         |
|                         | COPD / Emphysema                                                  | 86         | 7.7%         |
|                         | No                                                                | 1010       | 90.3%        |

Patients history

|                                                  |                                   | Count | Column N % |
|--------------------------------------------------|-----------------------------------|-------|------------|
| Premedication                                    | Diazepam                          | 5     | .8%        |
|                                                  | Midazolam                         | 130   | 21.0%      |
|                                                  | Lorazepam                         | 290   | 46.8%      |
|                                                  | Lorazepam, Diazepam               | 53    | 8.5%       |
|                                                  | Lorazepam, Midazolam              | 87    | 14.0%      |
|                                                  | Lorazepam, Midazolam,<br>Diazepam | 33    | 5.3%       |
|                                                  | Other                             | 6     | 1.0%       |
|                                                  | None                              | 16    | 2.6%       |
| Family Hx of IHD                                 | No                                | 875   | 79.2%      |
|                                                  | Yes                               | 230   | 20.8%      |
| Heart failure                                    | No                                | 1048  | 97.0%      |
|                                                  | Yes                               | 32    | 3.0%       |
| Previous cardiac vascular<br>or thoracic surgery | CAB                               | 8     | .8%        |
|                                                  | Carotid                           | 3     | .3%        |
|                                                  | Congenital                        | 1     | .1%        |
|                                                  | Thoracic                          | 1     | .1%        |
|                                                  | Valve                             | 1     | .1%        |
|                                                  | Other                             | 2     | .2%        |
|                                                  | None                              | 966   | 98.4%      |
| Number of previous heart<br>operations           | One                               | 11    | 1.0%       |
|                                                  | Two                               | 2     | .2%        |
|                                                  | Four                              | 1     | .1%        |
|                                                  | None                              | 1105  | 98.7%      |

Pre-Op Measures

|                                            |                                          | Count | Column N % |
|--------------------------------------------|------------------------------------------|-------|------------|
| Angina                                     | No Angina                                | 61    | 5.5%       |
|                                            | Angina at rest                           | 150   | 13.5%      |
|                                            | Angina with mild exercise                | 116   | 10.5%      |
|                                            | Angina with moderate exercise            | 571   | 51.5%      |
|                                            | Angina with strenuous exercise           | 211   | 19.0%      |
| Dyspnoea                                   | Mild limitation of ordinary activity     | 343   | 30.9%      |
|                                            | Moderate limitation of ordinary activity | 425   | 38.3%      |
|                                            | Symptomatic at rest or minimal activity  | 118   | 10.6%      |
|                                            | No limitation of physical activity       | 223   | 20.1%      |
| Poor mobility                              | No                                       | 678   | 98.8%      |
|                                            | Yes                                      | 8     | 1.2%       |
| Poor mobility due to any noncardiac reason | No                                       | 659   | 99.1%      |
|                                            | Yes                                      | 6     | .9%        |
| Operative urgency                          | Elective                                 | 809   | 72.3%      |
|                                            | Emergency                                | 116   | 10.4%      |
|                                            | Urgent                                   | 183   | 16.4%      |
|                                            | Salvage                                  | 11    | 1.0%       |
| Preop intra-aortic balloon pump used       | No                                       | 1025  | 91.6%      |
|                                            | Yes                                      | 94    | 8.4%       |

Intra and postoperative measures

|                               |                                   | Count | Column N % |
|-------------------------------|-----------------------------------|-------|------------|
| CABG_procedure                | CABG on pump                      | 321   | 47.1%      |
|                               | CABG on pump-beating heart        | 67    | 9.8%       |
|                               | CABG on pump-beating heart, OPCAB | 18    | 2.6%       |
|                               | CABG on pump-resting heart        | 24    | 3.5%       |
|                               | CABG on pump-resting heart, OPCAB | 8     | 1.2%       |
|                               | OPCAB                             | 240   | 35.2%      |
|                               | OPCAB, CABG on pump               | 4     | .6%        |
| Number_of_arterial_grafts     | One                               | 754   | 67.4%      |
|                               | Two                               | 337   | 30.1%      |
|                               | Three                             | 26    | 2.3%       |
|                               | Four                              | 2     | .2%        |
| Intraaortic_balloon_pump_used | No                                | 994   | 94.4%      |
|                               | Intra-operatively                 | 49    | 4.7%       |
|                               | Post-operatively                  | 10    | .9%        |
| Complications                 | No                                | 633   | 94.8%      |
|                               | Yes                               | 35    | 5.2%       |
| Infective_complication        | Leg                               | 47    | 4.4%       |
|                               | Mediastinitis                     | 1     | .1%        |
|                               | Superficial infection             | 5     | .5%        |
|                               | Other                             | 3     | .3%        |
|                               | None                              | 1014  | 94.8%      |
| PLoS                          | Average or Below                  | 740   | 66.1%      |
|                               | Above Average                     | 379   | 33.9%      |
